# Supplementary material for: Vax2 regulates retinoic acid distribution and cone opsin expression in the vertebrate eye
Source: Oxford University Press journal article supplement (doi:10.1242/dev.051037), 2010-12-10
Supplement: dev051037-tables1.pdf [file dev051037-tables1.pdf]

**Table S1. Oligonucleotide primers and morpholino sequences**

| Oligonucleotide   | Sequence                         | Gene              | Species |
|-------------------|----------------------------------|-------------------|---------|
| Cyp26a1-F         | CAGTGCTACGTGCTCGTGAT             | <i>Cyp26a1</i>    | Mouse   |
| Cyp26a1-R         | TCCTCCAAATGGAATGAAGC             |                   |         |
| Opn1sw-F          | CTGGAGATGGTGTGCAGGAAG            | <i>Opn1sw</i>     | Mouse   |
| Opn1sw-R          | GCTTACAGGTGAACAGACAC             |                   |         |
| Opn1mw-F          | GCTTACAGGTGAACAGACAC             | <i>Opn1mw</i>     | Mouse   |
| Opn1mw-R          | GCAGGTGACACTGAAGAGAC             |                   |         |
| LacZ-F            | CTCCGGCTGCGGTAGTTCAGGCAGTTC      | LacZ cassette     |         |
| LacZ-R            | CGCTAAATACTGGCAGGCGTTTCGTCAG     |                   |         |
| olVax2-F          | GAAGAGTGAAGTGCAGGAAGG            | <i>Vax2</i>       | medaka  |
| olVax2-R          | CCTCTTGACAGGGTGACAGG             |                   |         |
| Opn1sw-promoter-F | GGGGTACCCC-ACGATTCTTCTGCTATCACCC |                   | Mouse   |
| Opn1sw-promoter-R | GGGGTACCCC-AACCCAGACTATTCAGAAGAG |                   |         |
| Vax2-F            | ATGGGCGATGGGGGCGCGGA             | <i>Vax2</i>       | Mouse   |
| Vax2-R            | TAAATGTCAGCTTCTTGT               |                   |         |
| olOpn1sws1-F      | CGATGGGAAAATACTTCTACC            | <i>olOpn1sws1</i> | medaka  |
| olOpn1sws1-R      | ACTTCTTCTCAGCCTTCTGC             |                   |         |
| olRaldh2F1        | AGCAGATCTGTGAAGTCCAGG            | <i>olRaldh2</i>   | medaka  |
| olRaldh2R1        | CTCAGTTGATCCTGTGAAAGC            |                   |         |
| Hprt-RT-F         | GAAGAGCTACTGTAATGATCAG           | <i>Hprt</i>       | Mouse   |
| Hprt-RT-R         | GCTGTACTGCTTAACCAGGG             |                   |         |
| Thrb-RT-F         | CAGATGCCATCTTTGACCTG             | <i>Thrb</i>       | Mouse   |
| Thrb-RT-R         | GTGTTCAAAGGCCAACAGGA             |                   |         |
| olOpn1mw-F        | GAGAAGTGTCCAGGATGGTG             | <i>OlOpn1mw</i>   | medaka  |
| olOpn1mw-R        | AATCTTTCATCAACACGTGC             |                   |         |
| Vax2-morpholino   | CAACCAAGTTAACCAGTCTCTTAGG        | <i>Vax2</i>       | medaka  |
| mmVax2-morpholino | CAAGCAACTTAAGCAGTGTCTTACG        | <i>Vax2</i>       | medaka  |
| Enh1Raldh3-F      | GGGGTACCCC-GGCTGGAAGTGCCAAAGATC  |                   | Mouse   |
| Enh1Raldh3-R      | GGGGTACCCC-TGTTCTGGCACTGGGTTAC   |                   |         |
| Enh2Raldh3-F      | GGGGTACCCC-AGCACAGGAATGGATTGACC  |                   | Mouse   |
| Enh2Raldh3-R      | GGGGTACCCC-TGGCCCTGAGGACACAACAG  |                   |         |
| Enh3Raldh3-F      | GGGGTACCCC-GAACCATTGTAGTTTAGACAG |                   | Mouse   |
| Enh3Raldh3-R      | GGGGTACCCC-AAATGTCTCCAGCACCAACTC |                   |         |
| Opn1sw RT-F       | CCAGTTGCTGAGGACTCTC              | <i>Opn1sw</i>     | Mouse   |
| Opn1sw RT-R       | GTAGCAGAGACAGAAGGATC             |                   |         |
| Cyp26a1 RT-F      | CAGGAGGGTTTCGGGTTGC              | <i>Cyp26a1</i>    | Mouse   |
| Cyp26a1 RT-R      | GAGGCACTATAAAGCGGTCCG            |                   |         |
| Opn1mw RT-F       | CTTCCACTCAGCATCATCG              | <i>Opn1mw</i>     | Mouse   |
| Opn1mw RT-R       | CAGTATGCGAAGACCATCAC             |                   |         |
| Cyp26b1 RT-F      | GCAAGGTCTTCTCCAAGATC             | <i>Cyp26b1</i>    | Mouse   |
| Cyp26b1 RT-R      | GCCTCCTGATATACATTGATG            |                   |         |
