# Supplementary material for: Vax2 regulates retinoic acid distribution and cone opsin expression in the vertebrate eye
Source: Oxford University Press journal article supplement (doi:10.1242/dev.051037), 2010-12-10
Supplement: dev051037-tables2.pdf [file dev051037-tables2.pdf]

**Table S2. List of templates displaying altered expression in *Vax2* mutant mice as assessed by microarray analysis**

| Template ID | Gene          | Variation in <i>Vax2</i> mice versus control | Stage |
|-------------|---------------|----------------------------------------------|-------|
| 452907_at   | Galc          | Upregulated                                  | E12.5 |
| 435628_x_at | 2610305J24Rik | Upregulated                                  | E12.5 |
| 418494_at   | Ebf2          | Upregulated                                  | E12.5 |
| 419430_at   | Cyp26a1       | Upregulated                                  | E12.5 |
| 448321_at   | Smoc1         | Downregulated                                | E12.5 |
| 435865_at   | Hist3h2a      | Upregulated                                  | E16.5 |
| 448321_at   | Smoc1         | Downregulated                                | E16.5 |
| 457521_at   | unknown       | Downregulated                                | E16.5 |
| 419430_at   | Cyp26a1       | Upregulated                                  | E16.5 |
| 419373_at   | Atp6v1b1      | Upregulated                                  | E16.5 |
| 448789_at   | Aldh1a3       | Downregulated                                | E16.5 |
| 449132_at   | Opn1sw        | Downregulated                                | P60   |
| 418552_at   | Opn1sw        | Downregulated                                | P60   |
| 452183_a_at | Gtl2          | Upregulated                                  | P60   |
| 426758_s_at | Gtl2          | Upregulated                                  | P60   |
| 417765_a_at | Amy1          | Upregulated                                  | P60   |
| 446148_x_at | Rbm39         | Upregulated                                  | P60   |
| 416783_at   | Tac1          | Upregulated                                  | P60   |
| 446147_at   | Rbm39         | Upregulated                                  | P60   |
| 419723_at   | Opn1mw        | Upregulated                                  | P60   |
| 418724_at   | Cfi           | Upregulated                                  | P60   |
| 424105_a_at | Pttg1         | Downregulated                                | P60   |
