# Supplementary figures and images for: Vax2 regulates retinoic acid distribution and cone opsin expression in the vertebrate eye
Source: Oxford University Press journal article supplement (doi:10.1242/dev.051037), 2010-12-10

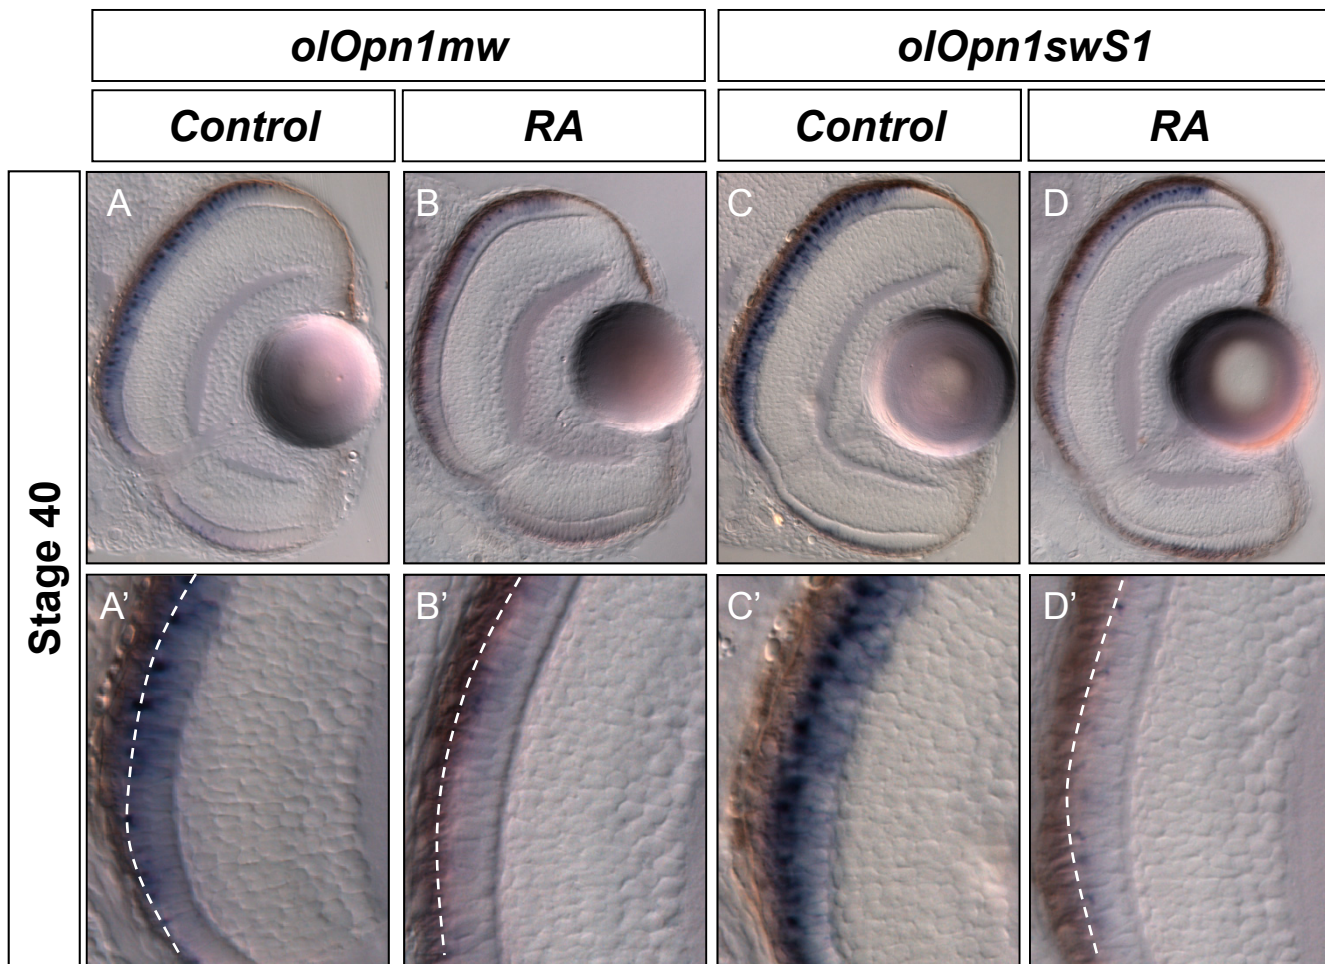

Supplement: dev051037figs1.pdf [file dev051037figs1.pdf]

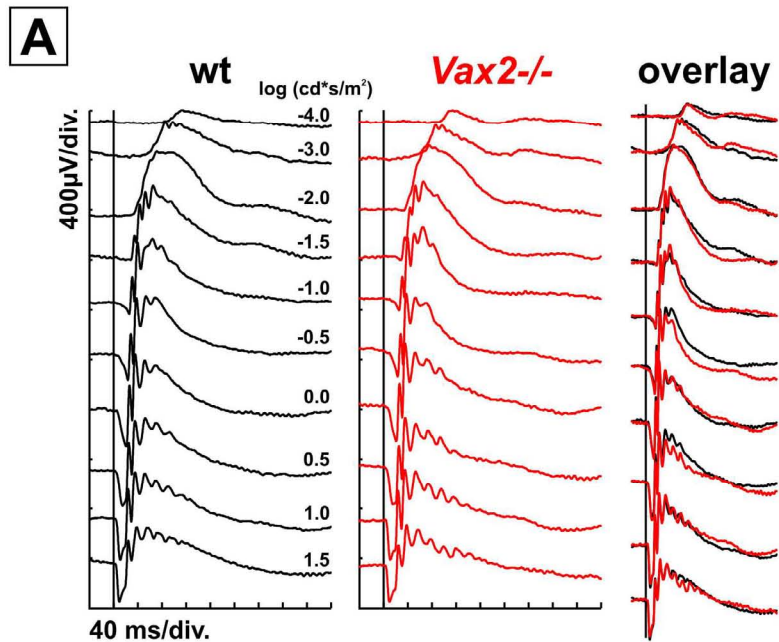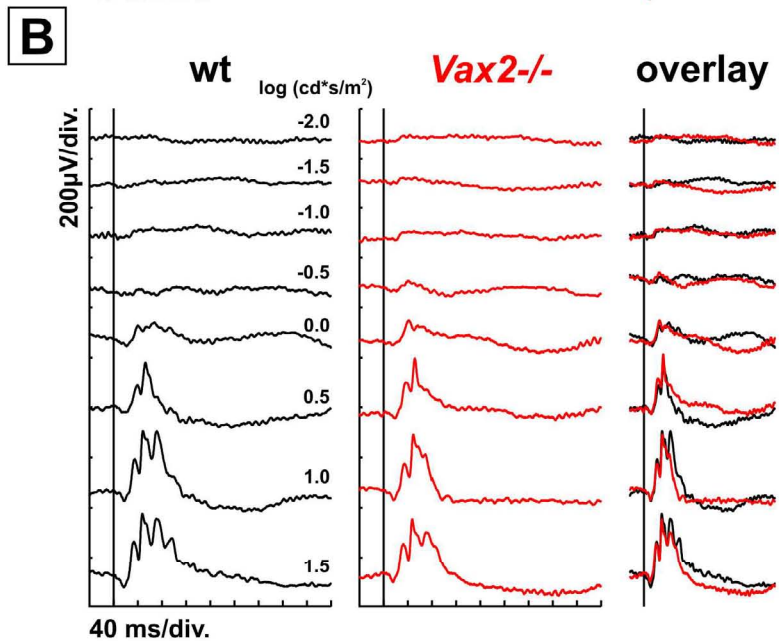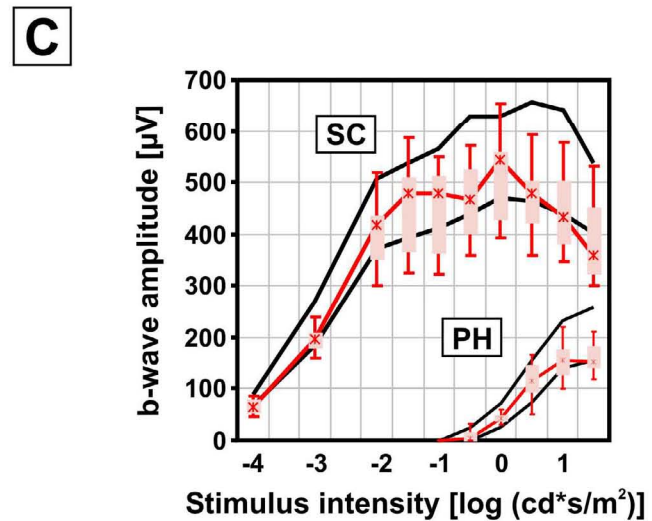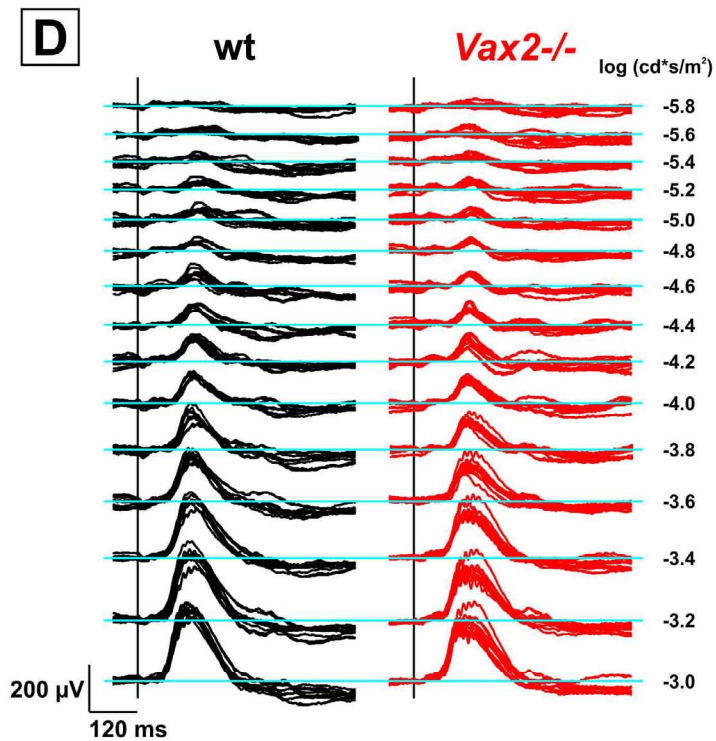

Supplement: dev051037figs2.pdf [file dev051037figs2.pdf]
